# Supplementary material for: The influence of workplace stressors on the risk of cardiovascular diseases among healthcare providers: a systematic review
Source: Front Psychiatry. 2025 Aug 21;16:1461698. doi: 10.3389/fpsyt.2025.1461698 (PMC12409286; doi:10.3389/fpsyt.2025.1461698)
Supplement: Supplementary file 1 [file Table1.xlsx]

## Sheet: Sheet1
Study ID	NOS (Cohort )									Final score
	Selection				comprability	outcome			Outcome score
	Representativeness of the exposed cohort	Selection of the non-exposed cohort	Ascertainment of Exposure	Demonstration that that outcome of interest was not present at the start of the study	comprability Of cohorts on the basis of design or analysis controlled for confounders	Assessment of outcome	was follow up long eough for outcomes to occur	Adequacy of follow up of cohorts
Allesøe, 2017	*	*			**	*	*	*	7	Good
Adams, 1998	*		*	*	*	*	*		6	Fair
Brown, 2003	*			*		*	*	*	5	Fair
Chen, 2015	*		*	*	**	*	*	*	8	Good
Dutheil, 2017	*			*		*	*	*	5	Fair
Fatima, 2012	*	*	*		**	*	*		7	Good
Fialho, 2006	*		*	*	*	*	*		6	Fair
Coffeng, 2018	*			*		*	*	*	5	Fair
Jensen, 2019	*	*			**	*	*	*	7	Good
Kubo, 2011	*			*		*	*	*	5	Fair
Refaat, 2014	*			*		*	*	*	5	Fair
Riese, 2004	*		*	*	**	*	*	*	8	Good
Vetter, 2016	*		*	*	*	*	*		6	Fair
