# Supplementary material for: The influence of workplace stressors on the risk of cardiovascular diseases among healthcare providers: a systematic review
Source: Front Psychiatry. 2025 Aug 21;16:1461698. doi: 10.3389/fpsyt.2025.1461698 (PMC12409286; doi:10.3389/fpsyt.2025.1461698)
Supplement: Supplementary file 2 [file Table2.xlsx]

## Sheet: Cross sectional 
Study ID	NOS (Cross-sectional )								Final Quality score
	Selection				comprability	outcome		Outcome score
	Representativeness of the sample	sample size	Non-responsents	Ascertainment of the exposure (risk factor)	The subjects in different outcocme groups are comparable, based on the study design and analysis . Confounding factors are controlled	Assessment of outcome	Statistical test
Arnetz, 1998	*	*	*	*	**	*	*	8	Good
Cash, 2021	*	*	*	*	*	*	*	7	Good
Chou, 2016	*	*		*	*	*	*	6	Good
Chou, 2015	*	*	*	*	*	*	*	7	Good
Coelho, 2022	*	*			**	*	*	6	Fair
Ezber. 2023	*			*	*	*		4	Poor
Ferreira, 2021	*	*			*	*	*	5	Fair
Lajoie, 2015	*	*		*	*	*	*	6	Good
Landsbergis, 2013	*	*			*	*	*	5	Fair
Ramin, 2014	*			*	**	*	*	6	Fair
Riese, 2000	*	*	*	*	*	*	*	7	Good
SABERINIA, 2020	*		*		*	*	*	5	Fair
Temporelli, 2013	*			*	*	*		4	Poor
Ulguim, 2019	*	*			**	*	*	6	Fair
Ramadan, 2024	*	*	*	*	*	*	*	7	Good
