# Supplementary material for: The influence of workplace stressors on the risk of cardiovascular diseases among healthcare providers: a systematic review
Source: Front Psychiatry. 2025 Aug 21;16:1461698. doi: 10.3389/fpsyt.2025.1461698 (PMC12409286; doi:10.3389/fpsyt.2025.1461698)
Supplement: Supplementary file 3 [file Table3.xlsx]

## Sheet: Sheet1
Study ID
	Selection				comprability	outcome			Outcome score
	Is the case definition adequate ?	Representativeness of cases	Selection of Controls	Definition of controls	comparability of cases and controls on the basis of design or analysis controlled for confounders	Assessment of outcome	was follow up long eough for outcomes to occur	Adequacy of follow up of cohorts
Vitale, 2022	*	*	*	*	*	*	*	*	8	Good
Känel, 2023	*	*			*		*	*	5	Fair
Nedić, 2016	*		*		*	*	*	*	6	Fair
